# Supplementary material for: NGS based identification of mutational hotspots for targeted therapy in anaplastic thyroid carcinoma
Source: PubMed Central journal article supplement (PMC5522092; doi:10.18632/oncotarget.17300), 2017-04-20
Supplement: oncotarget-08-42613-s001.pdf [file oncotarget-08-42613-s001.pdf]

## NGS based identification of mutational hotspots for targeted therapy in anaplastic thyroid carcinoma

### Supplementary Materials

**Supplementary Table 1: Mutations in the analysed genes 118 ATC primary tumour samples and the relative prevalence of each mutation in %.** See Supplementary\_Table\_1

**Supplementary Table 2: Panel of analyzed genes and exons**

| Gene          | Exon             |
|---------------|------------------|
| <i>ALK</i>    | 20–25            |
| <i>BRAF</i>   | 11, 15           |
| <i>CDKN2A</i> | 2                |
| <i>EGFR</i>   | 18–21            |
| <i>ERBB2</i>  | 20, 23           |
| <i>HRAS</i>   | 2–4              |
| <i>KRAS</i>   | 2–4              |
| <i>KIT</i>    | 9–11, 13, 17, 18 |
| <i>MET</i>    | 14               |
| <i>mTOR</i>   | 4, 5             |
| <i>NRAS</i>   | 2–4              |
| <i>PDGFRA</i> | 12, 14, 18       |
| <i>PIK3CA</i> | 10, 21           |
| <i>RB1</i>    | 18               |
| <i>RET</i>    | 10, 11, 13–16    |
| <i>TSC2</i>   | 30               |
| <i>p53</i>    | 4–9              |
